# Supplementary material for: Cancer metastasis networks and the prediction of progression patterns
Source: PubMed Central journal article supplement (PMC2736851; doi:10.1038/sj.bjc.6605214), 2009-08-25
Supplement: 6605214x1.pdf [file 6605214x1.pdf]

## Supplemental Information

### Additional Methods

**Statistical significance.** For every  $\varphi$ -correlation, we tested the hypothesis that  $\varphi \neq 0$  by a  $t$ -test, where  $t$  is calculated by:

$$t = \frac{\varphi \sqrt{\max(m_i, m_j) - 2}}{\sqrt{1 - \varphi^2}} \quad [\text{S1}]$$

The max function gives the most conservative value for  $t$  when the incidence of the two variables being correlated is unequal. The  $p$ -value was then calculated using Student's  $t$  cumulative distribution function with degrees of freedom  $\max(m_i, m_j) - 2$ . The  $p$ -value threshold for significance was set at 0.01. For every relative risk value, we estimated the significance at the 0.01 level by calculating its 99% upper and lower confidence bounds (25):

$$RR_{X,ij} \exp\left(\pm 2.56 \left(\frac{1}{C_{ij}} + \frac{1}{m_i m_j} - \frac{1}{N_X} - \frac{1}{N_X^2}\right)\right) \quad [\text{S2}]$$

**Clustering.** We hierarchically clustered primary tumor types and metastasis sites using MATLAB 7.5 (MathWorks Inc., Natick, MA). Ward's linkage was used, which employs an incremental within-cluster sum of squares, defined as the sum of the squares of all distances between objects within a cluster and the cluster centroid.

Table S1. Primary cancer site and corresponding ICD-9 codes.

|    | <b>Site</b>                  | <b>ICD-9 code</b> |
|----|------------------------------|-------------------|
| 1  | Lip                          | 140               |
| 2  | Tongue                       | 141               |
| 3  | Salivary glands              | 142               |
| 4  | Gum                          | 143               |
| 5  | Floor of mouth               | 144               |
| 6  | Mouth, other                 | 145               |
| 7  | Oropharynx                   | 146               |
| 8  | Nasopharynx                  | 147               |
| 9  | Hypopharynx                  | 148               |
| 10 | Esophagus                    | 150               |
| 11 | Stomach                      | 151               |
| 12 | Small intestine              | 152               |
| 13 | Colon                        | 153               |
| 14 | Rectum and anus              | 154               |
| 15 | Liver                        | 155               |
| 16 | Gallbladder                  | 156               |
| 17 | Pancreas                     | 157               |
| 18 | Peritoneum                   | 158               |
| 19 | Nasal cavities               | 160               |
| 20 | Larynx                       | 161               |
| 21 | Lung and bronchus            | 162               |
| 22 | Pleura                       | 163               |
| 23 | Thymus, heart, or peritoneum | 164               |
| 24 | Bone                         | 170               |
| 25 | Connective tissue            | 171               |
| 26 | Skin, melanoma               | 172               |
| 27 | Skin, other                  | 173               |
| 28 | Breast, female               | 174               |
| 29 | Breast, male                 | 175               |
| 30 | Cervix                       | 180               |
| 31 | Uterus                       | 182               |
| 32 | Ovary                        | 183               |
| 33 | Genital, female other        | 184               |
| 34 | Prostate                     | 185               |
| 35 | Testis                       | 186               |
| 36 | Genital, male other          | 187               |
| 37 | Bladder                      | 188               |
| 38 | Kidney                       | 189               |
| 39 | Eye                          | 190               |
| 40 | Brain                        | 191               |
| 41 | Nervous system, other        | 192               |
| 42 | Thyroid                      | 193               |
| 43 | Other endocrine              | 194               |

Table S2. Metastasis site and corresponding ICD-9 code.

|    | <b>Site</b>                | <b>ICD-9 code</b> |
|----|----------------------------|-------------------|
| 1  | LN of head, face, and neck | 196.0             |
| 2  | Intrathoracic LN           | 196.1             |
| 3  | Intra-abdominal LN         | 196.2             |
| 4  | Axillary LN                | 196.3             |
| 5  | Inguinal LN                | 196.5             |
| 6  | Intrapelvic LN             | 196.6             |
| 7  | LN of multiple sites       | 196.8             |
| 8  | LN, other                  | 196.9             |
| 9  | Lung                       | 197.0             |
| 10 | Mediastinum                | 197.1             |
| 11 | Pleura                     | 197.2             |
| 12 | Respiratory, other         | 197.3             |
| 13 | Small intestine            | 197.4             |
| 14 | Large intestine and rectum | 197.5             |
| 15 | Peritoneum                 | 197.6             |
| 16 | Liver                      | 197.7             |
| 17 | Digestive, other           | 197.8             |
| 18 | Kidney                     | 198.0             |
| 19 | Urinary, other             | 198.1             |
| 20 | Skin                       | 198.2             |
| 21 | Brain and spinal cord      | 198.3             |
| 22 | Nervous system, other      | 198.4             |
| 23 | Bone                       | 198.5             |
| 24 | Ovary                      | 198.6             |
| 25 | Adrenal gland              | 198.7             |
| 26 | Breast                     | 198.81            |
| 27 | Genital                    | 198.82            |

Table S3. Confusion matrix of the multinomial logistic regression model predicting the primary cancer site from a sequence of metastases. Shown are the primary sites which yielded a true positive rate of >25%.

|           |                   | Predicted site |        |                   |                |       |          |
|-----------|-------------------|----------------|--------|-------------------|----------------|-------|----------|
|           |                   | Colon          | Larynx | Lung and bronchus | Breast, female | Ovary | Prostate |
| True site | Colon             | 80.4%          | 0.1%   | 2.7%              | 0.6%           | 8.5%  | 4.6%     |
|           | Larynx            | 10.7%          | 60.6%  | 13.2%             | 1.6%           | 0.7%  | 6.3%     |
|           | Lung and bronchus | 11.9%          | 1.6%   | 68.9%             | 1.5%           | 0.6%  | 14.3%    |
|           | Breast, female    | 8.9%           | 0.4%   | 14.6%             | 55.7%          | 1.6%  | 17.8%    |
|           | Ovary             | 20.8%          | 0.1%   | 3.3%              | 0.7%           | 63.8% | 6.1%     |
|           | Prostate          | 6.3%           | 0.3%   | 6.5%              | 0.4%           | 1.3%  | 83.7%    |

Table S4. Confusion matrix of the networks model predicting the primary cancer site from a sequence of metastases. Shown are the primary sites which yielded a true positive rate of >25%.

|           |                       | Predicted Site |                 |          |                   |        |                |              |        |       |                       |                     |
|-----------|-----------------------|----------------|-----------------|----------|-------------------|--------|----------------|--------------|--------|-------|-----------------------|---------------------|
|           |                       | Hypo-pharynx   | Small intestine | Pancreas | Lung and bronchus | Pleura | Breast, female | Breast, male | Cervix | Ovary | Genital, female other | Genital, male other |
| True Site | Hypo-pharynx          | 75.2%          | 0.6%            | 0.8%     | 1.1%              | 0.3%   | 3.8%           | 0.1%         | 0.0%   | 0.3%  | 0.0%                  | 0.1%                |
|           | Small intestine       | 0.4%           | 39.0%           | 10.2%    | 0.4%              | 0.3%   | 1.5%           | 0.1%         | 1.2%   | 34.4% | 0.2%                  | 0.0%                |
|           | Pancreas              | 0.7%           | 15.5%           | 39.8%    | 0.7%              | 1.1%   | 1.8%           | 0.1%         | 0.1%   | 23.5% | 0.1%                  | 0.1%                |
|           | Lung and bronchus     | 3.6%           | 1.7%            | 11.3%    | 28.0%             | 13.8%  | 15.5%          | 0.6%         | 0.1%   | 1.4%  | 0.0%                  | 0.1%                |
|           | Pleura                | 0.7%           | 1.0%            | 3.1%     | 8.6%              | 46.1%  | 10.8%          | 0.1%         | 0.0%   | 5.8%  | 0.0%                  | 0.0%                |
|           | Breast, female        | 2.2%           | 1.2%            | 2.2%     | 1.5%              | 2.9%   | 36.8%          | 29.4%        | 0.3%   | 3.0%  | 0.1%                  | 0.2%                |
|           | Breast, male          | 0.7%           | 0.7%            | 0.7%     | 1.3%              | 1.6%   | 15.8%          | 70.3%        | 0.0%   | 1.2%  | 0.1%                  | 0.0%                |
|           | Cervix                | 2.1%           | 4.3%            | 2.9%     | 0.8%              | 0.7%   | 5.6%           | 0.6%         | 27.2%  | 37.0% | 1.0%                  | 1.1%                |
|           | Ovary                 | 0.3%           | 3.0%            | 3.6%     | 0.4%              | 2.6%   | 1.0%           | 0.2%         | 1.6%   | 81.1% | 0.3%                  | 0.1%                |
|           | Genital, female other | 1.1%           | 2.1%            | 2.3%     | 0.3%              | 0.8%   | 5.4%           | 0.6%         | 13.4%  | 19.2% | 26.4%                 | 14.3%               |
|           | Genital, male other   | 1.9%           | 2.1%            | 2.4%     | 0.5%              | 0.8%   | 6.4%           | 0.8%         | 16.4%  | 8.5%  | 11.9%                 | 33.4%               |

Table S5. Comparisons of the diagonals (true positives) of the confusion matrices of the multinomial logistic regression (MLR) model and the networks model predicting the site of primary cancer given a sequence of metastases.

| <b>Primary site</b>          | <b>MLR model</b> | <b>Networks model</b> |
|------------------------------|------------------|-----------------------|
| Lip                          | 0.000%           | 1.304%                |
| Tongue                       | 2.793%           | 3.783%                |
| Salivary glands              | 5.190%           | 4.574%                |
| Gum                          | 0.000%           | 5.333%                |
| Floor of mouth               | 0.000%           | 1.124%                |
| Mouth, other                 | 0.000%           | 0.380%                |
| Oropharynx                   | 0.000%           | 3.279%                |
| Nasopharynx                  | 0.000%           | 7.349%                |
| Hypopharynx                  | 1.676%           | 75.188%               |
| Esophagus                    | 0.153%           | 1.238%                |
| Stomach                      | 4.885%           | 7.850%                |
| Small intestine              | 0.000%           | 39.017%               |
| Colon                        | 80.368%          | 0.000%                |
| Rectum and anus              | 1.757%           | 1.638%                |
| Liver                        | 0.000%           | 0.000%                |
| Gallbladder                  | 0.000%           | 12.007%               |
| Pancreas                     | 8.081%           | 39.790%               |
| Peritoneum                   | 0.000%           | 9.884%                |
| Nasal cavities               | 6.431%           | 14.975%               |
| Larynx                       | 60.646%          | 0.096%                |
| Lung and bronchus            | 68.930%          | 27.974%               |
| Pleura                       | 0.000%           | 46.143%               |
| Thymus, heart, or peritoneum | 0.000%           | 15.450%               |
| Bone                         | 0.000%           | 19.247%               |
| Connective tissue            | 0.000%           | 13.003%               |
| Skin, melanoma               | 2.860%           | 1.912%                |
| Skin, other                  | 1.030%           | 0.000%                |
| Breast, female               | 55.695%          | 36.843%               |
| Breast, male                 | 0.000%           | 70.254%               |
| Cervix                       | 0.000%           | 27.237%               |
| Uterus                       | 6.038%           | 0.423%                |
| Ovary                        | 63.836%          | 81.083%               |
| Genital, female other        | 5.809%           | 26.407%               |
| Prostate                     | 83.687%          | 0.006%                |
| Testis                       | 0.000%           | 19.540%               |
| Genital, male other          | 0.000%           | 33.422%               |
| Bladder                      | 2.796%           | 1.203%                |
| Kidney                       | 5.222%           | 7.533%                |
| Eye                          | 0.000%           | 10.616%               |
| Brain                        | 0.000%           | 14.320%               |
| Nervous system, other        | 0.000%           | 1.190%                |
| Thyroid                      | 0.691%           | 0.933%                |
| Other endocrine              | 0.000%           | 5.338%                |

Table S6. Accuracy of networks model in predicting the temporal sequence of metastases, by primary cancer site, for  $n_{\text{mets}} = 1$  and  $n_{\text{mets}} = 4$ .  $\bar{p}_f$  is the mean accuracy for the fractional method,  $\bar{p}_{\text{net}}$  is the mean accuracy for the networks model, and  $\bar{p}_{\text{net}}/\bar{p}_f$  is their ratio.  $N$  is the number of patients in each case.

| Primary site                   | $n_{\text{mets}} = 1$ |             |                        |                                  | $n_{\text{mets}} = 4$ |             |                        |                                  |
|--------------------------------|-----------------------|-------------|------------------------|----------------------------------|-----------------------|-------------|------------------------|----------------------------------|
|                                | $N$                   | $\bar{p}_f$ | $\bar{p}_{\text{net}}$ | $\bar{p}_{\text{net}}/\bar{p}_f$ | $N$                   | $\bar{p}_f$ | $\bar{p}_{\text{net}}$ | $\bar{p}_{\text{net}}/\bar{p}_f$ |
| Lip                            | 92                    | 31.5%       | 14.0%                  | 0.445                            | 1                     | 17.5%       | 23.9%                  | 1.364                            |
| Tongue                         | 750                   | 49.5%       | 29.1%                  | 0.589                            | 11                    | 6.1%        | 11.8%                  | 1.924                            |
| Salivary glands                | 395                   | 30.7%       | 9.0%                   | 0.294                            | 11                    | 9.4%        | 31.4%                  | 3.354                            |
| Gum                            | 168                   | 32.4%       | 17.4%                  | 0.536                            | 2                     | 2.3%        | 27.1%                  | 11.619                           |
| Floor of mouth                 | 323                   | 35.7%       | 20.2%                  | 0.565                            | 4                     | 3.8%        | 15.3%                  | 3.985                            |
| Mouth, other                   | 389                   | 31.5%       | 19.0%                  | 0.605                            | 6                     | 7.4%        | 4.4%                   | 0.595                            |
| Oropharynx                     | 348                   | 50.8%       | 26.8%                  | 0.528                            | 5                     | 16.3%       | 18.1%                  | 1.113                            |
| Nasopharynx                    | 120                   | 23.2%       | 20.2%                  | 0.869                            | 3                     | 19.5%       | 23.2%                  | 1.194                            |
| Hypopharynx                    | 401                   | 41.4%       | 17.0%                  | 0.411                            | 9                     | 6.1%        | 19.7%                  | 3.210                            |
| Esophagus                      | 1201                  | 11.4%       | 10.3%                  | 0.900                            | 52                    | 12.2%       | 20.7%                  | 1.690                            |
| Stomach                        | 3739                  | 22.2%       | 51.1%                  | 2.303                            | 174                   | 9.5%        | 17.5%                  | 1.837                            |
| Small intestine                | 793                   | 21.9%       | 5.9%                   | 0.271                            | 51                    | 10.0%       | 19.3%                  | 1.942                            |
| Colon                          | 23370                 | 26.5%       | 5.5%                   | 0.207                            | 981                   | 12.5%       | 22.5%                  | 1.802                            |
| Rectum and anus                | 8386                  | 19.3%       | 6.5%                   | 0.335                            | 352                   | 9.9%        | 20.4%                  | 2.059                            |
| Liver                          | 745                   | 21.1%       | 26.0%                  | 1.229                            | 15                    | 10.0%       | 9.1%                   | 0.914                            |
| Gallbladder                    | 1139                  | 24.5%       | 13.2%                  | 0.540                            | 49                    | 17.0%       | 34.1%                  | 1.998                            |
| Pancreas                       | 4036                  | 26.9%       | 11.2%                  | 0.415                            | 128                   | 13.7%       | 16.4%                  | 1.197                            |
| Peritoneum                     | 328                   | 14.0%       | 15.4%                  | 1.101                            | 46                    | 13.0%       | 24.2%                  | 1.864                            |
| Nasal cavities                 | 197                   | 13.8%       | 14.6%                  | 1.058                            | 7                     | 21.6%       | 33.0%                  | 1.532                            |
| Larynx                         | 1166                  | 27.4%       | 20.6%                  | 0.752                            | 24                    | 7.7%        | 16.4%                  | 2.119                            |
| Lung and bronchus              | 24905                 | 13.1%       | 7.0%                   | 0.533                            | 1090                  | 13.9%       | 21.3%                  | 1.533                            |
| Pleura                         | 261                   | 26.1%       | 17.0%                  | 0.651                            | 5                     | 12.7%       | 14.6%                  | 1.154                            |
| Thymus, heart, and mediastinum | 178                   | 11.3%       | 3.4%                   | 0.300                            | 12                    | 8.4%        | 8.6%                   | 1.027                            |
| Bone                           | 335                   | 25.6%       | 40.4%                  | 1.574                            | 8                     | 28.7%       | 13.4%                  | 0.466                            |
| Connective tissue              | 493                   | 16.3%       | 25.5%                  | 1.566                            | 15                    | 10.5%       | 18.2%                  | 1.735                            |
| Skin, melanoma                 | 691                   | 9.3%        | 6.8%                   | 0.732                            | 52                    | 7.6%        | 14.7%                  | 1.924                            |
| Skin, other                    | 1293                  | 10.7%       | 9.0%                   | 0.839                            | 22                    | 9.4%        | 14.5%                  | 1.538                            |
| Breast, female                 | 7081                  | 21.2%       | 17.3%                  | 0.818                            | 595                   | 19.7%       | 30.0%                  | 1.524                            |
| Breast, male                   | 233                   | 45.4%       | 6.4%                   | 0.140                            | 3                     | 9.5%        | 18.6%                  | 1.956                            |
| Cervix                         | 894                   | 14.2%       | 16.4%                  | 1.156                            | 46                    | 8.7%        | 9.6%                   | 1.095                            |
| Uterus                         | 3320                  | 17.1%       | 6.1%                   | 0.356                            | 236                   | 12.0%       | 15.6%                  | 1.306                            |
| Ovary                          | 3194                  | 28.3%       | 7.7%                   | 0.273                            | 703                   | 15.4%       | 22.7%                  | 1.474                            |
| Genital, female other          | 577                   | 17.9%       | 12.6%                  | 0.706                            | 21                    | 6.8%        | 12.9%                  | 1.895                            |
| Prostate                       | 26642                 | 34.5%       | 16.8%                  | 0.486                            | 347                   | 34.4%       | 31.5%                  | 0.917                            |
| Testis                         | 28                    | 10.3%       | 11.6%                  | 1.131                            | 2                     | 23.1%       | 81.1%                  | 3.505                            |
| Genital, male other            | 130                   | 22.2%       | 43.8%                  | 1.976                            | 5                     | 5.9%        | 1.2%                   | 0.204                            |
| Bladder                        | 4267                  | 10.8%       | 9.5%                   | 0.877                            | 174                   | 11.3%       | 15.8%                  | 1.404                            |
| Kidney                         | 2891                  | 12.3%       | 8.7%                   | 0.709                            | 175                   | 13.7%       | 24.8%                  | 1.810                            |
| Eye                            | 101                   | 19.7%       | 7.4%                   | 0.374                            | 4                     | 22.4%       | 28.9%                  | 1.295                            |
| Brain                          | 301                   | 45.7%       | 25.1%                  | 0.550                            | 8                     | 33.4%       | 26.2%                  | 0.783                            |
| Nervous system, other          | 86                    | 24.3%       | 2.8%                   | 0.117                            | 2                     | 5.0%        | 10.4%                  | 2.091                            |
| Thyroid                        | 777                   | 23.0%       | 12.9%                  | 0.561                            | 29                    | 9.1%        | 20.2%                  | 2.223                            |
| Other endocrine                | 98                    | 12.1%       | 5.8%                   | 0.474                            | 8                     | 10.6%       | 2.6%                   | 0.242                            |

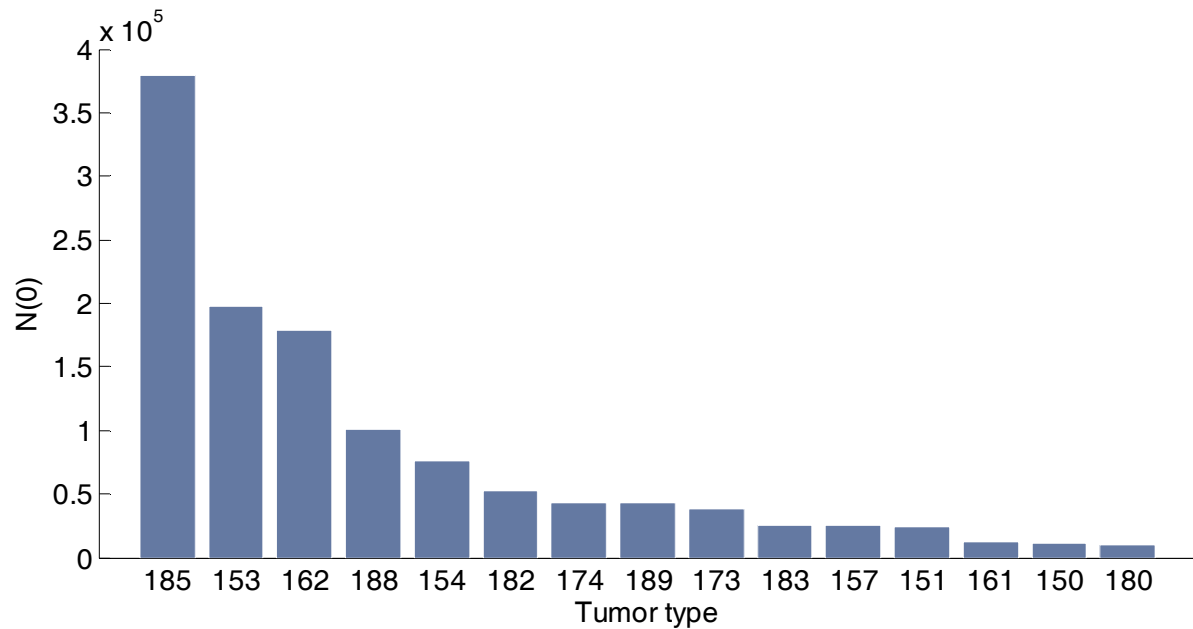

Figure S1. Number of diagnoses at time  $t=0$ , by primary site or tumor type (represented by the three-digit ICD-9 code). Note:  $t$  is defined as the time from the first diagnosis of a primary cancer. The primary sites that have the largest number of diagnoses within the dataset are (in descending order): prostate, colon, lung, and bladder.

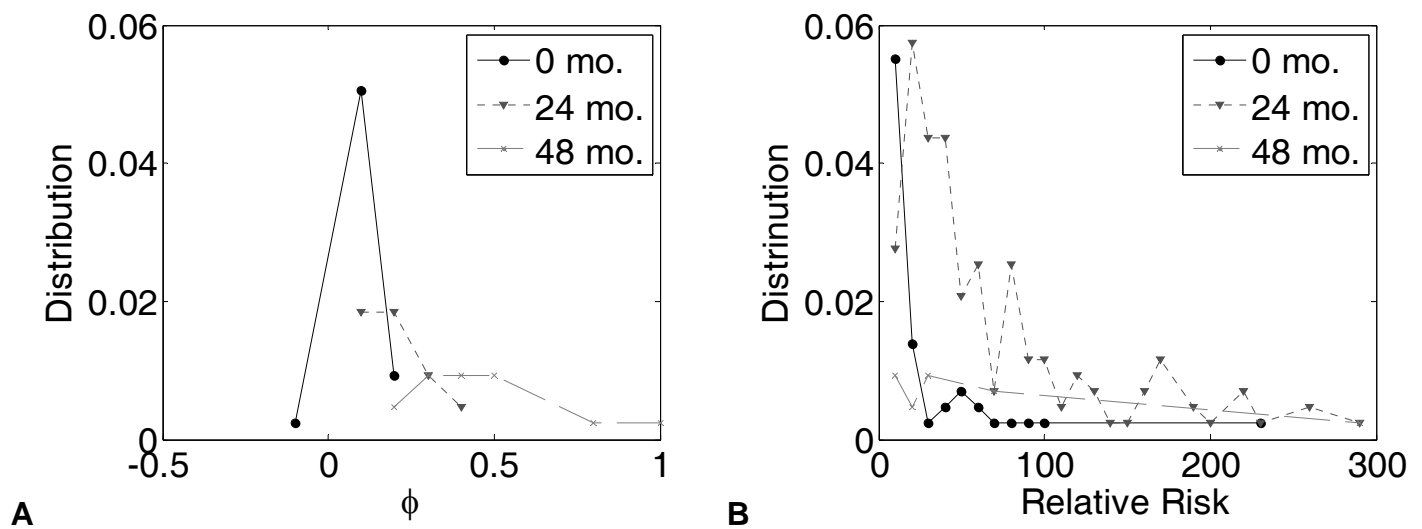

Figure S2. Distributions of  $A$ ,  $\phi$  and  $B$ , relative risk values over time, for colon cancer. Colon cancer was chosen as a representative example. As time progresses, the peaks of the  $\phi$  distribution shift toward higher values of  $\phi$  and the distributions encompass a much larger range. It is less obvious how the relative risk distribution behaves over time, but it appears that the RR distribution also shifts toward higher values.

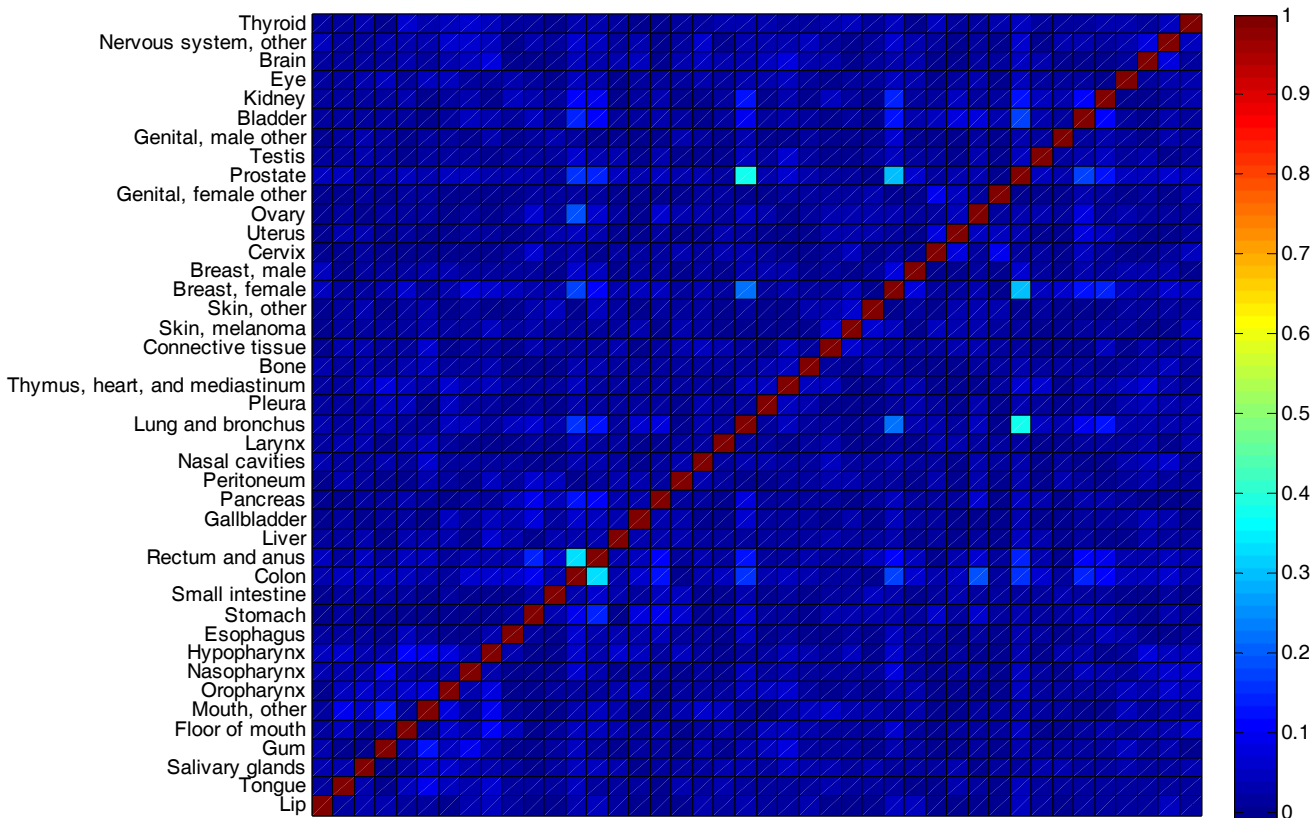

Figure S3. Correlation coefficient matrix by primary tumor type based on metastasis link dynamics. Using the phi measure and with significance set at 0.01, we measured the pair-wise correlations between metastasis network links for every primary cancer type. While the vast majority of primary cancer types exhibit low correlation values with one another based on this, a few do stand out: (i) 'colon' and 'rectum and anus', (ii) 'lung and bronchus' and 'prostate', (iii) 'breast, female' and 'prostate'.



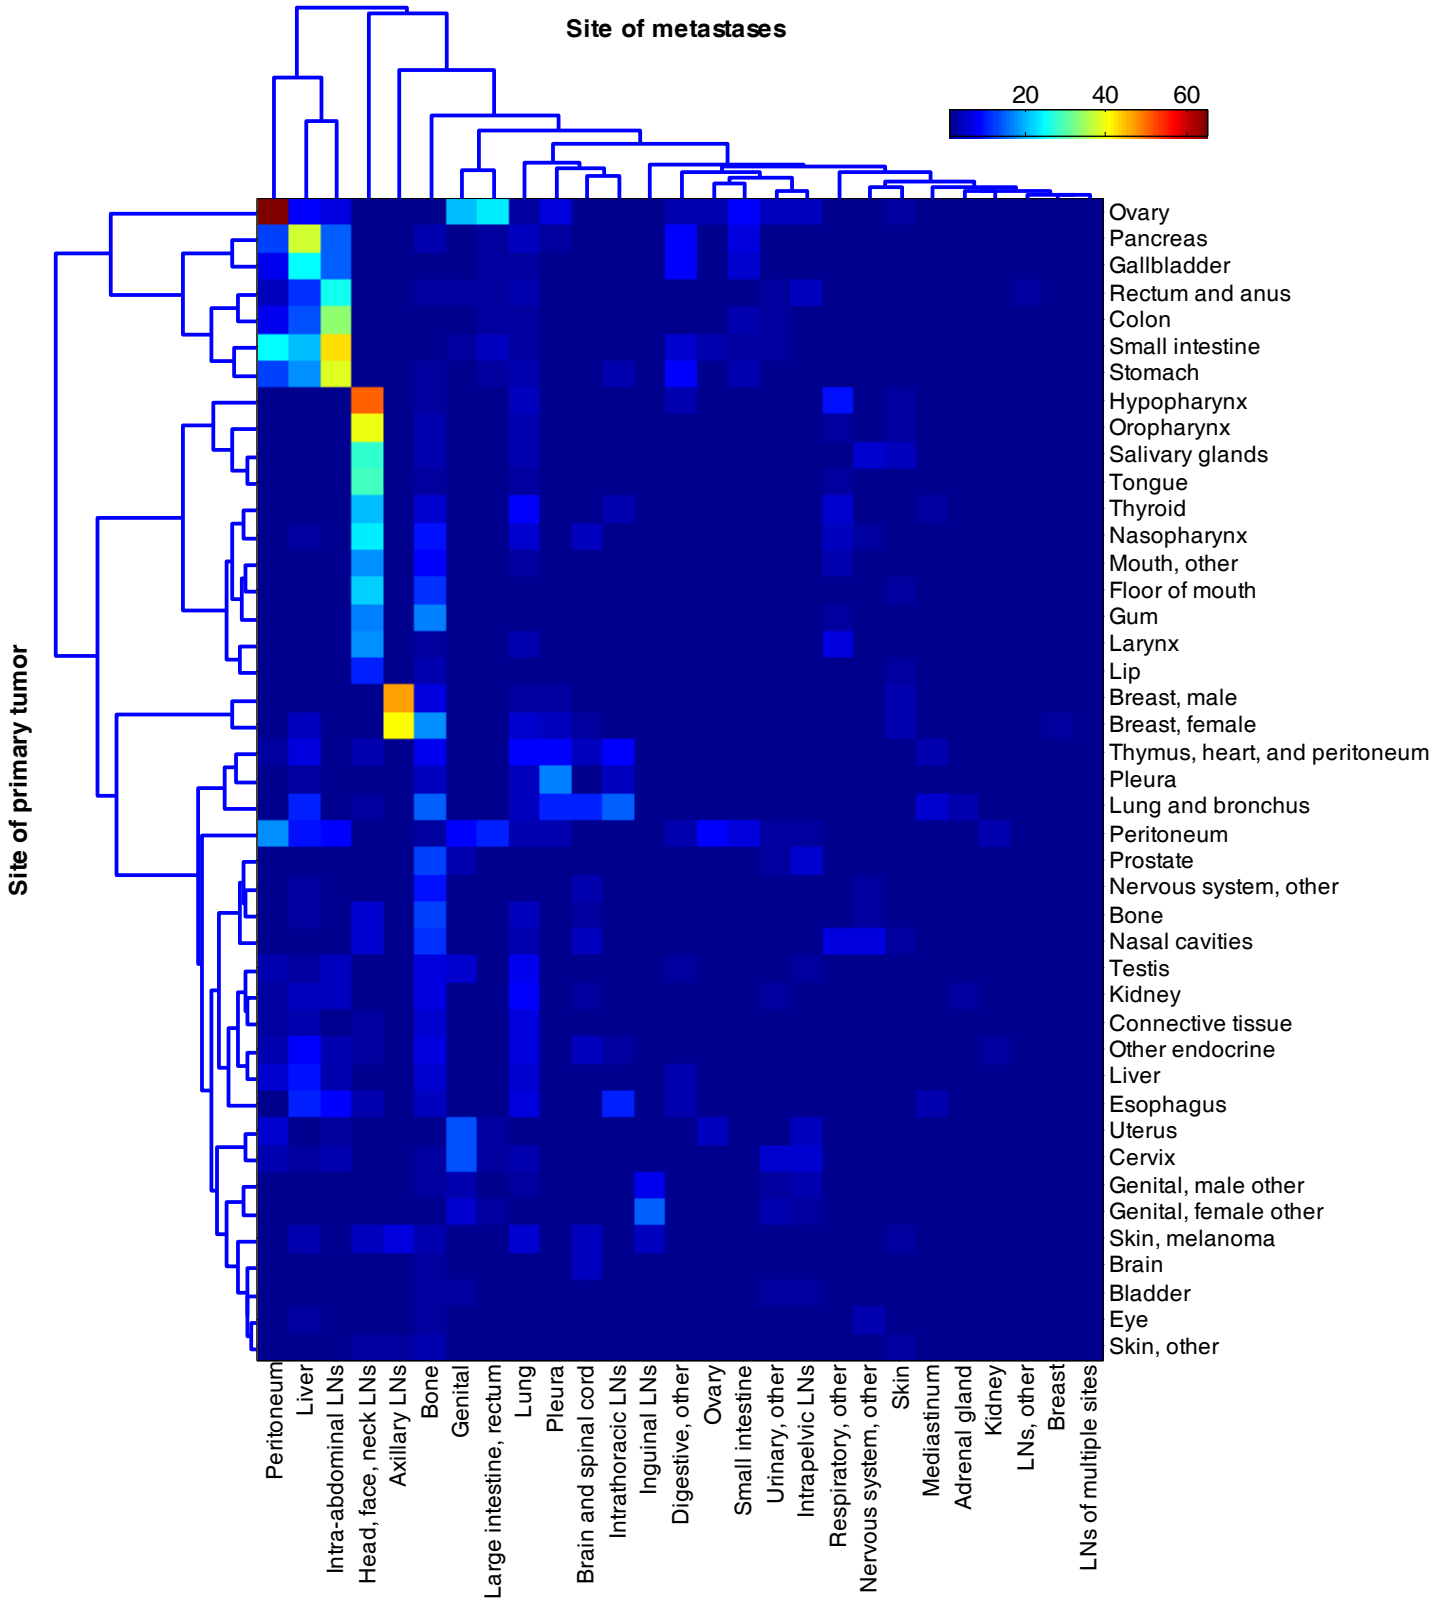

Figure S4. Clustergram of primary tumor types by characteristic sites of metastasis, at t=0.

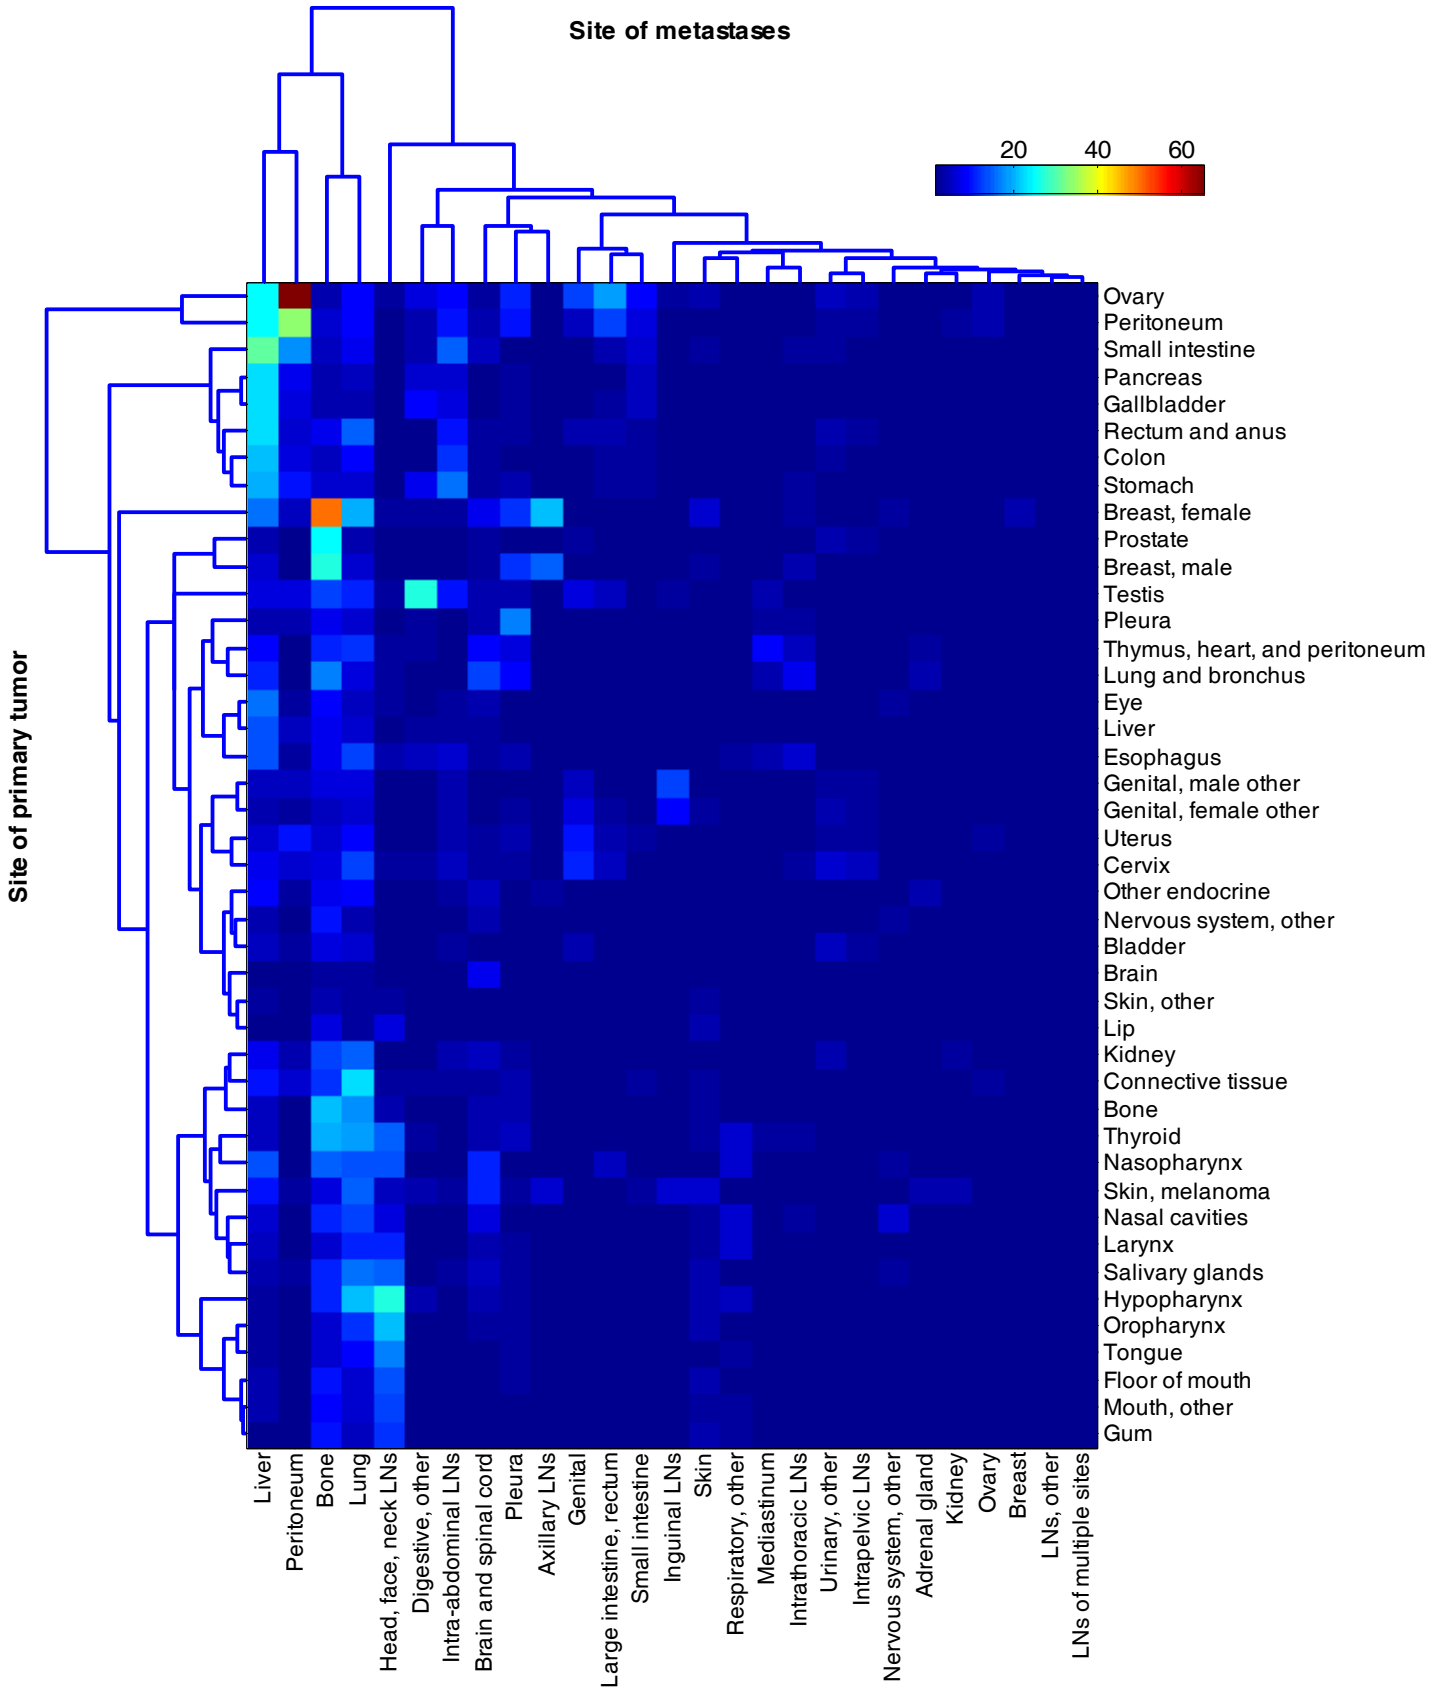

Figure S5. Clustergram of primary tumor types by characteristic sites of metastasis, at t=48 months.
